# Supplementary material for: The role of gene fusions in the evolution of metabolic pathways: the histidine biosynthesis case
Source: PubMed Central journal article supplement (PMC1963479; doi:10.1186/1471-2148-7-s2-s4), 2007-08-16
Supplement: 1471-2148-7-S2-S4-S2.pdf [file 1471-2148-7-S2-S4-S2.pdf]

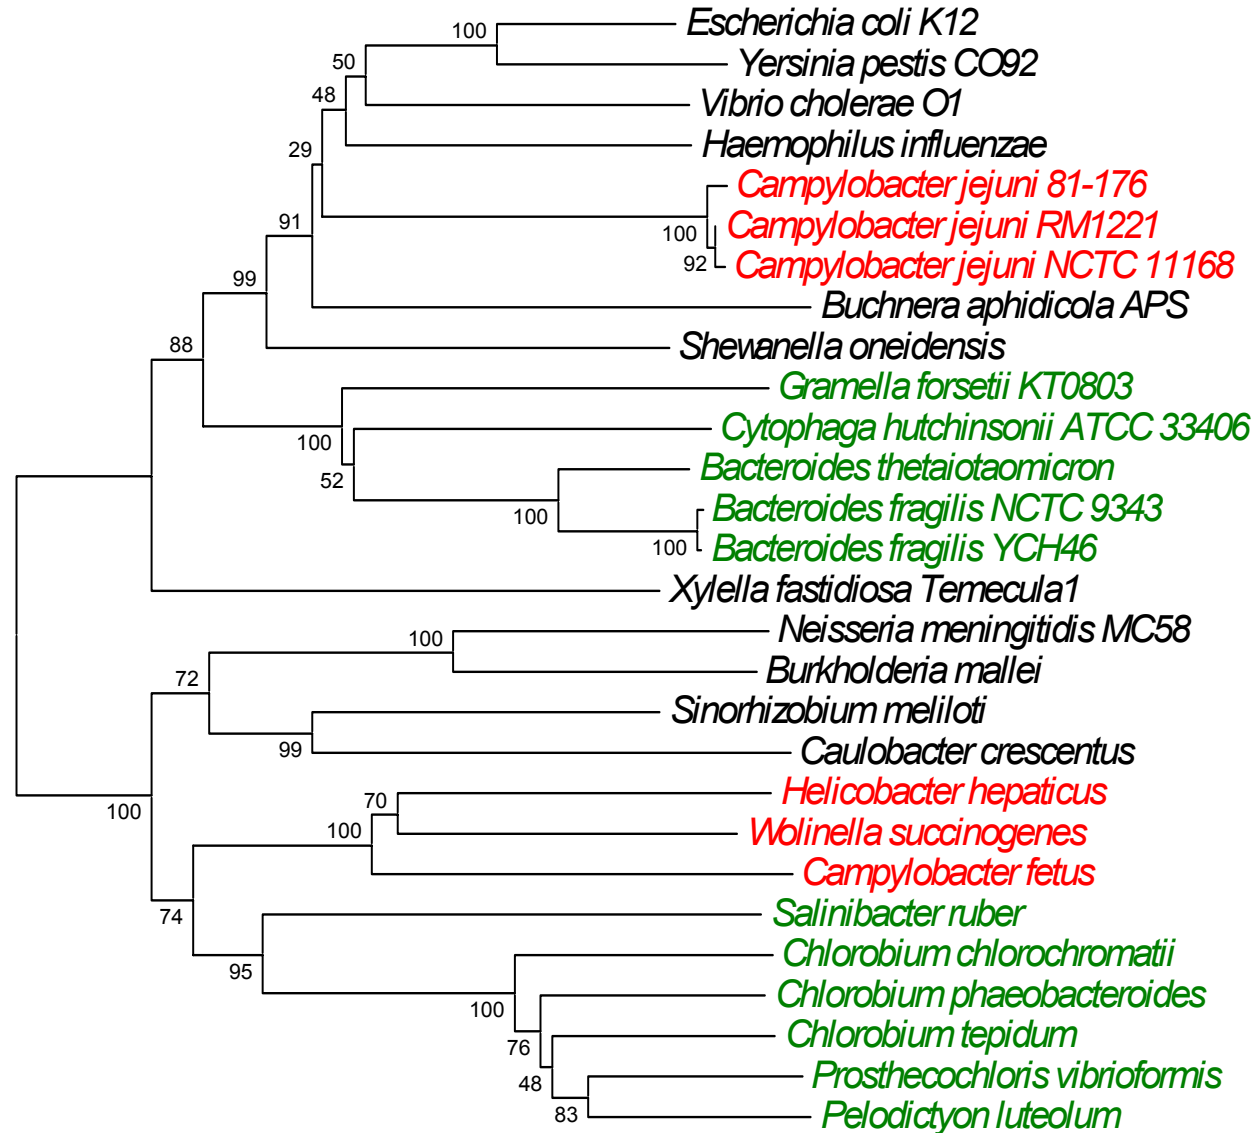

0.1
