# Supplementary material for: The role of gene fusions in the evolution of metabolic pathways: the histidine biosynthesis case
Source: PubMed Central journal article supplement (PMC1963479; doi:10.1186/1471-2148-7-s2-s4), 2007-08-16
Supplement: 1471-2148-7-S2-S4-S3.pdf [file 1471-2148-7-S2-S4-S3.pdf]

| Organism                                                    | Length | GI        | Taxonomy | Gene organization§                                                              | Genome Status |
|-------------------------------------------------------------|--------|-----------|----------|---------------------------------------------------------------------------------|---------------|
| <i>alpha proteobacterium HTCC2255</i>                       | 357    | 114773289 | a        | G* <b>XG**DC</b> [NB]HAF[IE]---BHAF[IE]---ZG***---additional copies (scattered) | unfinished    |
| <i>Bacteroides thetaiotaomicron VPI-5482</i>                | 374    | 29345613  | CFB      | GDC[NB]---HAF[IE]                                                               | finished      |
| <i>Bacteroides fragilis YCH46</i>                           | 374    | 53714474  | CFB      | GDC[NB]---HAF[IE]                                                               | finished      |
| <i>Cytophaga hutchinsonii ATCC 33406</i>                    | 372    | 110637675 | CFB      | GD---C[NB]HAF---I                                                               | finished      |
| <i>Gramella forsetii KT0803</i>                             | 379    | 120436112 | CFB      | GDC[NB]HAF[IE]                                                                  | finished      |
| <i>Croceibacter atlanticus HTCC2559</i>                     | 377    | 83858108  | CFB      | GDCX[NB]HAF[IE]                                                                 | unfinished    |
| <i>Cellulophaga sp. MED134</i>                              | 378    | 86130227  | CFB      | GDC[NB]HA---??                                                                  | unfinished    |
| <i>Tenacibaculum sp. MED152</i>                             | 379    | 86133445  | CFB      | G1G2C[NB]HAF[IE]                                                                | unfinished    |
| <i>Flavobacterium sp. MED217</i>                            | 385    | 86143306  | CFB      | GDC[NB]HAXF[IE]                                                                 | unfinished    |
| <i>Flavobacteriales bacterium HTCC2170</i>                  | 377    | 88712457  | CFB      | GDC[NB]HAXFXX[IE]                                                               | unfinished    |
| <i>Polaribacter irgensii 23-P</i>                           | 378    | 88802980  | CFB      | GDC[NB]HAXF[IE]                                                                 | unfinished    |
| <i>Robiginitalea biformata HTCC2501</i>                     | 388    | 88805687  | CFB      | GDC[NB]HAXF[IE]                                                                 | unfinished    |
| <i>Flavobacteria bacterium BBFL7</i>                        | 369    | 89891713  | CFB      | GDC[NB]HAXF[IE]                                                                 | unfinished    |
| <i>Flavobacterium johnsoniae UW101</i>                      | 378    | 90592003  | CFB      | GDC[NB]HAF[IE]                                                                  | unfinished    |
| <i>Psychroflexus torquis ATCC 700755</i>                    | 377    | 91217706  | CFB      | GDC[NB]HAF[IE]                                                                  | unfinished    |
| <i>Microscilla marina ATCC 23134</i>                        | 373    | 124006022 | CFB      | GDC[NB]---HA--I--E                                                              | unfinished    |
| <i>Algoriphagus sp. PR1</i>                                 | 365    | 126646562 | CFB      | GDC[NB]---HAF[IE]                                                               | unfinished    |
| <i>Flavobacteria bacterium BAL38</i>                        | 379    | 126664303 | CFB      | GD1---D2C1C2[NB]HAF[IE]                                                         | unfinished    |
| <i>Campylobacter lari RM2100</i>                            | 355    | 57241587  | e        | GD[NB]HAF[IE]                                                                   | unfinished    |
| <i>Campylobacter upsaliensis RM3195</i>                     | 352    | 57242505  | e        | GD[NB]XXHAXFXX[IE]                                                              | unfinished    |
| <i>Campylobacter coli RM2228</i>                            | 353    | 57504889  | e        | GD[NB]HAF[IE]                                                                   | unfinished    |
| <i>Photorhabdus luminescens subsp. laumondii TTO1</i>       | 355    | 37525515  | g        | GDC[NB]HAF[IE]                                                                  | finished      |
| <i>Yersinia enterocolitica subsp. enterocolitica 8081</i>   | 355    | 123442984 | g        | GDC[NB]HAF[IE]                                                                  | finished      |
| <i>Shewanella baltica OS155</i>                             | 363    | 126174641 | g        | GDC[NB]HAF[IE]                                                                  | finished      |
| <i>Shewanella loihica PV-4</i>                              | 356    | 127513128 | g        | GDC[NB]HAF[IE]                                                                  | finished      |
| <i>Erwinia carotovora subsp. atroseptica SCRI1043</i>       | 355    | 50121509  | g        | GDC[NB]HAF[IE]                                                                  | finished      |
| <i>Yersinia pseudotuberculosis IP 32953</i>                 | 355    | 51595896  | g        | GDC[NB]HAF[IE]                                                                  | finished      |
| <i>Mannheimia succiniciproducens MBEL55E</i>                | 365    | 52425945  | g        | GDC[NB]XXXXHAXF[IE]                                                             | finished      |
| <i>Legionella pneumophila subsp. pneumophila str. Phila</i> | 352    | 52841430  | g        | GDC[NB]HAF[IE]                                                                  | finished      |
| <i>Legionella pneumophila str. Paris</i>                    | 352    | 54297154  | g        | GDC[NB]HAF[IE]                                                                  | finished      |
| <i>Legionella pneumophila str. Lens</i>                     | 352    | 54294141  | g        | GDC[NB]HAF[IE]                                                                  | finished      |
| <i>Photobacterium profundum SS9</i>                         | 361    | 54308282  | g        | GDC[NB]HAF[IE]                                                                  | finished      |
| <i>Idiomarina loihiensis L2TR</i>                           | 358    | 56460937  | g        | GDC[NB]HAF[IE]                                                                  | finished      |
| <i>Xanthomonas oryzae pv. oryzae KACC10331</i>              | 375    | 58581881  | g        | GDC[NB]HAF[IE]                                                                  | finished      |
| <i>Vibrio fischeri ES114</i>                                | 357    | 59711622  | g        | GDC[NB]HAF[IE]                                                                  | finished      |
| <i>Colwellia psychrerythraea 34H</i>                        | 361    | 71282446  | g        | GDC[NB]HAF[IE]                                                                  | finished      |
| <i>Candidatus Blochmannia pennsylvanicus str. BPEN</i>      | 356    | 71892239  | g        | GDC[NB]HAF[IE]                                                                  | finished      |
| <i>Shigella sonnei Ss046</i>                                | 356    | 74312565  | g        | GDC[NB]HAF[IE]                                                                  | finished      |
| <i>Pseudoalteromonas haloplanktis TAC125</i>                | 353    | 77362400  | g        | GDC[NB]HAXXXXF[IE]                                                              | finished      |
| <i>Shigella dysenteriae Sd197</i>                           | 356    | 82777446  | g        | GDC[NB]HAF[IE]                                                                  | finished      |
| <i>Shigella boydii Sb227</i>                                | 355    | 82543399  | g        | GDC[NB]HAF[IE]                                                                  | finished      |
| <i>Sodalis glossinidius str. 'morsitans'</i>                | 355    | 85059105  | g        | GDC[NB]HAF[IE]                                                                  | finished      |
| <i>Shewanella denitrificans OS217</i>                       | 355    | 91792971  | g        | GDC[NB]HAF[IE]                                                                  | finished      |
| <i>Baumannia cicadellincola str. Hc (Homalodisca coagu)</i> | 356    | 94676488  | g        | GDC[NB]HAF[IE]                                                                  | finished      |
| <i>Pseudoalteromonas atlantica T6c</i>                      | 358    | 109899190 | g        | GDC[NB]HAXF[IE]                                                                 | finished      |
| <i>Shewanella sp. MR-4</i>                                  | 363    | 113970135 | g        | GDC[NB]HAF[IE]                                                                  | finished      |
| <i>Shewanella sp. MR-7</i>                                  | 363    | 114047675 | g        | GDC[NB]HAF[IE]                                                                  | finished      |
| <i>Shewanella frigidimarina NCIMB 400</i>                   | 355    | 114562892 | g        | GDC[NB]HAF[IE]                                                                  | finished      |
| <i>Aeromonas hydrophila subsp. hydrophila ATCC 7966</i>     | 383    | 117618028 | g        | GDC[NB]HAXXXF[IE]                                                               | finished      |
| <i>Shewanella sp. ANA-3</i>                                 | 363    | 117920296 | g        | GDC[NB]HAF[IE]                                                                  | finished      |
| <i>Shewanella amazonensis SB2B</i>                          | 355    | 119775079 | g        | GDC[NB]HAF[IE]                                                                  | finished      |
| <i>Psychromonas ingrahamii 37</i>                           | 356    | 119945366 | g        | GDC[NB]HAXXXXF[IE]                                                              | finished      |
| <i>Shewanella sp. W3-18-1</i>                               | 363    | 120598644 | g        | GDC[NB]HAF[IE]                                                                  | finished      |
| <i>Actinobacillus pleuropneumoniae serovar 1 str. 4074</i>  | 363    | 53729148  | g        | GDCX[NB]XHAF[IE]                                                                | unfinished    |
| <i>Shigella boydii BS512</i>                                | 355    | 75177149  | g        | GDC[NB]HAF[IE]                                                                  | unfinished    |
| <i>Actinobacillus succinogenes 130Z</i>                     | 364    | 75429723  | g        | GDCX[NB]XH---A---F[IE]                                                          | unfinished    |
| <i>Shewanella putrefaciens CN-32</i>                        | 363    | 77815195  | g        | GDC[NB]HAF[IE]                                                                  | unfinished    |
| <i>Yersinia bercovieri ATCC 43970</i>                       | 355    | 77959284  | g        | GDC[NB]HAF[IE]                                                                  | unfinished    |
| <i>Yersinia mollaretii ATCC 43969</i>                       | 355    | 77962462  | g        | GDC[NB]HAF[IE]                                                                  | unfinished    |
| <i>Yersinia frederiksenii ATCC 33641</i>                    | 355    | 77975877  | g        | GDC[NB]HAF[IE]                                                                  | unfinished    |
| <i>Yersinia intermedia ATCC 29909</i>                       | 355    | 77978866  | g        | GDC[NB]HAF[IE]                                                                  | unfinished    |
| <i>Shigella dysenteriae 1012</i>                            | 355    | 83571264  | g        | GDC[NB]HAF[IE]                                                                  | unfinished    |
| <i>Vibrio splendidus 12B01</i>                              | 362    | 84391744  | g        | GDC[NB]HAF[IE]                                                                  | unfinished    |
| <i>Idiomarina baltica OS145</i>                             | 358    | 85712681  | g        | GDC[NB]HAF[IE]                                                                  | unfinished    |
| <i>Vibrio sp. MED222</i>                                    | 362    | 86147092  | g        | GDC[NB]HAF[IE]                                                                  | unfinished    |
| <i>Alteromonas macleodii 'Deep ecotype'</i>                 | 356    | 88794032  | g        | GDC[NB]HAF[IE]                                                                  | unfinished    |
| <i>Pseudoalteromonas tunicata D2</i>                        | 353    | 88857348  | g        | GDC[NB]HAXF[IE]                                                                 | unfinished    |
| <i>Photobacterium sp. SKA34</i>                             | 356    | 89075755  | g        | GDC[NB]HAF[IE]                                                                  | unfinished    |
| <i>Psychromonas sp. CNPT3</i>                               | 356    | 90407647  | g        | GDC[NB]HAF[IE]                                                                  | unfinished    |
| <i>Photobacterium profundum 3TCK</i>                        | 361    | 90411636  | g        | GDC[NB]HAF[IE]                                                                  | unfinished    |
| <i>Vibrio angustum S14</i>                                  | 356    | 90580090  | g        | GDC[NB]HAF[IE]                                                                  | unfinished    |
| <i>Vibrio alginolyticus 12G01</i>                           | 357    | 91226028  | g        | GDC[NB]HAF[IE]                                                                  | unfinished    |
| <i>Shewanella baltica OS195</i>                             | 363    | 113950503 | g        | GDC[NB]HAF[IE]                                                                  | unfinished    |
| <i>Vibrio sp. Ex25</i>                                      | 357    | 116183729 | g        | GDC[NB]HAF[IE]                                                                  | unfinished    |
| <i>Yersinia pseudotuberculosis IP 31758</i>                 | 355    | 117673997 | g        | GDC[NB]HAF[IE]                                                                  | unfinished    |
| <i>Serratia proteamaculans 568</i>                          | 355    | 118067988 | g        | GDC[NB]HAF[IE]                                                                  | unfinished    |
| <i>Shewanella woodyi ATCC 51908</i>                         | 359    | 118074420 | g        | GDC[NB]HAXXXXF[IE]                                                              | unfinished    |
| <i>Enterobacter sp. 638</i>                                 | 355    | 118739614 | g        | GDC[NB]HAF[IE]                                                                  | unfinished    |
| <i>Shewanella pealeana ATCC 700345</i>                      | 364    | 118757732 | g        | GDC[NB]HAF[IE]                                                                  | unfinished    |
| <i>Alteromonadales bacterium TW-7</i>                       | 353    | 119470924 | g        | GDC[NB]HAF[IE]                                                                  | unfinished    |
| <i>Stenotrophomonas maltophilia R551-3</i>                  | 357    | 119879014 | g        | GDC[NB]HAF[IE]                                                                  | unfinished    |

§ --- indicates a large (>10kb) separation between genes or gene clusters, X indicates a non his genes

\* fragment? Only 167 residues vs average HisG >200

\*\* long or E. coli type, it is autonomously feedback inhibited

\*\*\* short type (requires HisZ for feedback inhibition and proper functioning)
